# Supplementary material
Source: publisher figshare collection journal article supplement (https://acs.figshare.com/ndownloader/files/4556788)
Supplement: Supplementary file 1 [file 4556788]

## Supporting Information

# Hydrothermal Synthesis, Structures and Properties of Manganese(II) and Zinc(II) Coordination Polymers with Different Phenylenediacrylates

*Qian Sun, Qi Yue, Jian-Yong Zhang, Li Wang, Xue Li, En-Qing Gao*

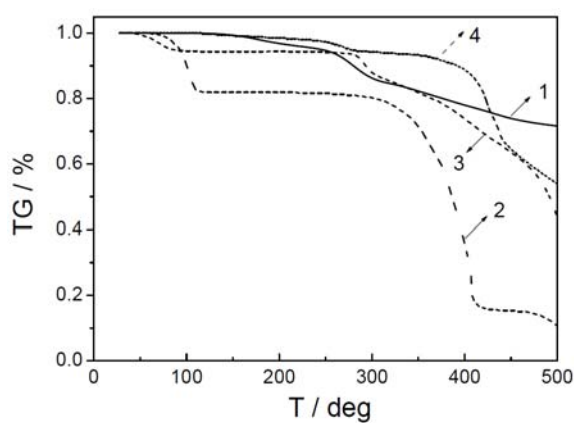

Figure S1. TGA curves for compounds **1**~**4**.

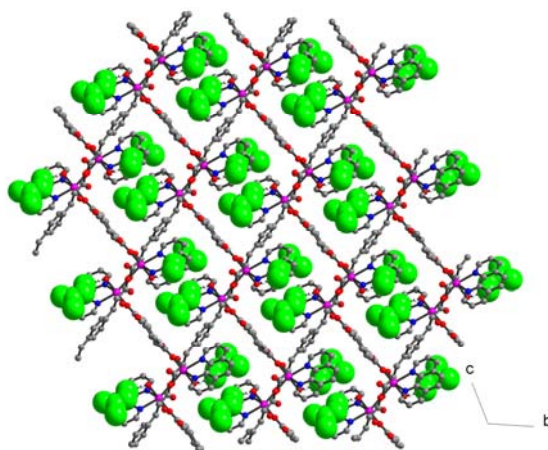

Figure S2. Viewing the structure of compound **2** down the *a* axis (green balls represent the DMF molecules filling the cavities).

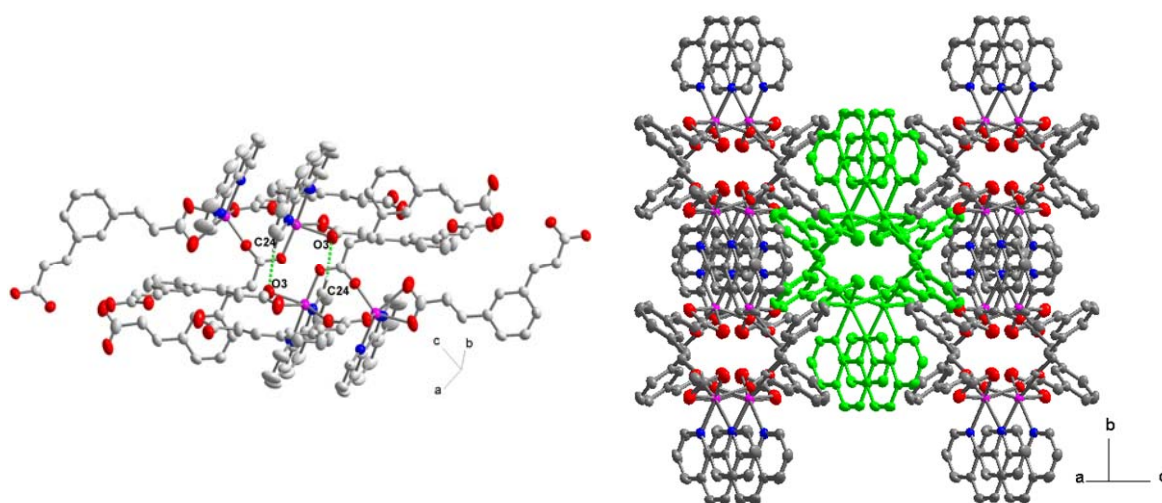

Figure S3. The interchain C-H...O hydrogen bonds (left) and the 3D packing of the chains (right) in compound **4**.

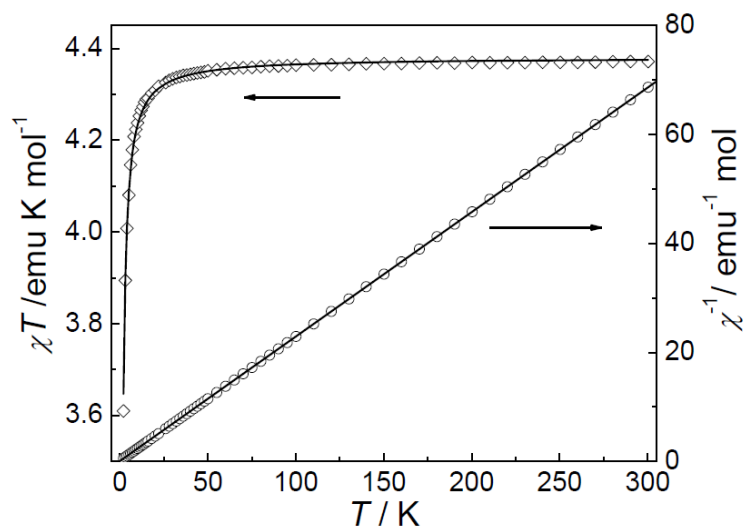

Figure S4.  $\chi T$  and  $\chi^{-1}$  versus  $T$  curves for complex **2**. The  $\chi T$  solid line represents the best fit to the dimeric model, and the  $\chi^{-1}$  solid line corresponds to the Curie-Weiss law.
